# Supplementary material
Source: publisher site journal article supplement (https://www.degruyterbrill.com/publication/journal_key/ZSTW/downloadAsset/ZSTW_ZSTW_Jahresregister_2024.pdf)
Supplement: Supplementary file 1 [file ZSTW_ZSTW_Jahresregister_2024.pdf]

# ZEITSCHRIFT FÜR DIE GESAMTE STRAFRECHTSWISSENSCHAFT MIT AUSLANDSRUNDSCHAU

## GESAMTSCHRIFTLEITUNG

Prof. Dr. *Jörg Eisele*, Tübingen

## REDAKTION

Inlandsteil: Dr. *Alexander Bechtel*, Tübingen

Auslandsrundschau: Privatdozent Dr. *Marc Engelhart*, Freiburg i.Br.

Dr. *Benjamin Vogel*, Freiburg i.Br.

Mitarbeiter: *Ines Hofmann*, Freiburg i.Br. (Auslandsrundschau)

## HERAUSGEGEBEN VON

Prof. Dr. *Jörg Eisele*, Tübingen

Prof. Dr. *Helmut Fuchs*, Wien

Prof. Dr. *Sabine Gleß*, Basel

Prof. Dr. Dr. h.c. *Luís Greco*, Berlin

Prof. Dr. *Tatjana Hörnle*, Freiburg i.Br.

Prof. Dr. *Thomas Rönna*, Hamburg

Prof. Dr. *Frank Saliger*, München

Prof. Dr. Dr. h.c. mult. *Ulrich Sieber*, Freiburg i.Br.

Prof. Dr. *Carl-Friedrich Stuckenberg*, Bonn

Prof. Dr. *Thomas Weigend*, Köln

Prof. Dr. *Ingeborg Zerb*, Wien

## IN VERBINDUNG MIT

Prof. Dr. Dr. h.c. *Manfred Burgstaller*, Wien

Prof. Dr. Dr. h.c. mult. *Albin Eser* (†), Freiburg i.Br.

Prof. Dr. Dr. h.c. mult. *Günther Jakobs*, Bonn

Prof. Dr. Dr. Dres. h.c. *Kristian Küh*, Tübingen

Prof. Dr. Dres. h.c. *Ulfrid Neumann*, Frankfurt a.M.

Prof. Dr. Dr. h.c. mult. *Claus Roxin*, München

Prof. Dr. Dr. h.c. mult. *Bernd Schünemann*, München

## JOURNAL COORDINATOR

*Beata Adamczyk*, De Gruyter

**DE GRUYTER**



# Inhaltsverzeichnis des 136. Bandes der Zeitschrift für die gesamte Strafrechtswissenschaft

## I. Abhandlungen

- 1** Kristian Kühl zum 80. Geburtstag  
Von Professor Dr. *Jörg Eisele*, Tübingen
- 6** Mittelbare Drittschädigungen bei verbotenen Kraftfahrzeugrennen  
Von Professor Dr. *Christoph Wolf*, Wiesbaden
- 57** Die verhetzende Beleidigung als neuer Straftatbestand zur Bekämpfung von Hasskriminalität – Eine kritische Betrachtung des § 192a StGB  
Von *Laura Schwarz*, Berlin und Professor Dr. *Martin Heger*, Berlin
- 103** Grenzen der Revisibilität der Rechtsfrage in der strafprozessualen Revision  
Von Professor em. Dr. Dres. h.c. *Ulfrid Neumann*, Frankfurt a.M.
- 127** Unzulässige Verfahrensrügen: Möglichkeiten der Begegnung – Zugleich ein Beitrag zur zivilrechtlichen Haftungssituation des Strafverteidigers im Revisionsverfahren  
Von *Hao-Hao Wu*, München
- 
- 255** Über Irrtümer im Strafrecht  
Von Professorin Dr. *Ingeborg Puppe*, Bonn
- 271** Die Diebstahlsdelikte in der Informationsgesellschaft  
Von Professor Dr. *Florian Knauer*, Jena
- 298** Die Sperrwirkung im Strafrecht  
Von *Jan-Christian Schröder*, Bochum
- 348** Das Prinzip der gegenseitigen Anerkennung im Europäischen Strafrecht  
Von Privatdozent Dr. *Maximilian Lenk*, Tübingen
- 373** „Opferstrafrecht“ – Paradigmenwechsel im deutschen Strafrecht  
Von Professorin Dr. *Frauke Rostalski*, Köln
- 
- 413** Mysterium nachträgliche Sicherungsverwahrung nach § 66b StGB  
Von Professor Dr. *Jörg Kinzig*, Tübingen
- 433** Von dunklen und hellen Seiten des Strafrechts – Für eine differenzierte Haltung der Strafrechtswissenschaft zur Kriminalpolitik  
Von Professorin Dr. *Elisa Hoven*, Leipzig
- 451** 25 Jahre Brandstiftungsdelikte als „gemeingefährliche Straftaten“  
Von Dr. *Yao Li*, Potsdam
- 503** Die Strafbarkeit der „Einziehungsvereitelung“ gem. § 258 StGB  
Von Dr. *Tillmann Horter*, Düsseldorf
- 544** Die Wiederaufnahme des Verfahrens zuungunsten des Freigesprochenen gemäß § 362 Nr. 5 StPO  
Von Dr. *Amina Hoppe*, Köln und Professor Dr. *Frank Neubacher*, Köln
- 562** Der über Art. 103 Abs. 3 GG proklamierte partielle Vorrang des Friedens im Recht in seinem vorkonstitutionellen Gewand  
Von *Hanna Göken*, Erlangen-Nürnberg und Privatdozent Dr. *Tobias Kulhanek*, Erlangen-Nürnberg
- 589** Kleine Worte, große Wirkung? – Die Entschuldigung aus der Sicht des Strafrechts  
Von Dr. *Clara Herz*, München

**II Inhaltsverzeichnis**

**616** Weg von den Hürden, hin zu den Möglichkeiten: KI in Polizei und Straftatverfolgung  
Von Professorin Dr. *Liane Wörner*, LL.M. (UW-Madison), Konstanz

---

**643** Bernd Schünemann zum 80. Geburtstag  
Von Professorin Dr. *Tatjana Hörnle*, Freiburg

**645** Verantwortungsstrukturen und anomale Kontexte – Zugleich ein Beitrag zum  
Verbrechensbegriff  
Von Professor Dr. *Juan Pablo Montiel*, Buenos Aires (Argentinien)

**674** Systematisierung und Konstruktion eigenhändiger Delikte – Eine rechtsfolgenorientierte  
Untersuchung  
Von Mag. jur. *Jannis Bantele*, LL.M. (Keio), Heidelberg und Mag. jur. *Lea-Marie Loosen*,  
Konstanz

**697** Der Strafraum für den Besitz von Kinderpornographie – Aktuelle rechtspolitische Fragen  
zu § 184b StGB  
Von Professorin Dr. *Elisa Hoven*, Leipzig und Professor Dr. *Jörg Eisele*, Tübingen

**724** Der „Vermögensschaden“ beim Subventionsbetrug – Über die Zusammenhänge  
von Zweckverfehlung und Strafzumessung bei § 264 StGB  
Von Dr. *Samuel Strauß*, Konstanz

**776** Unternehmen vor dem Weltstrafgericht? – Zur Frage der Einführung einer Unternehmens-  
strafbarkeit in das IStGH-Statut unter Komplementaritätsgesichtspunkten  
Von Professorin Dr. *Laura Neumann*, Mannheim

**II. Literaturberichte**

**164** Strafvollzug  
Von Professor Dr. *Klaus Laubenthal*, Würzburg

**397** Neuere Strafrechtsgeschichte  
Von Professor Dr. *Arnd Koch*, Augsburg

**IV. Verzeichnis der Verfasser von Beiträgen**

|                   |                 |                         |            |
|-------------------|-----------------|-------------------------|------------|
| Bantele, Jannis   | <b>674</b>      | Li, Yao                 | <b>451</b> |
| Eisele, Jörg      | <b>1, 697</b>   | Loosen, Lea-Marie       | <b>674</b> |
| Göken, Clara      | <b>562</b>      | Montiel, Juan Pablo     | <b>645</b> |
| Heger, Martin     | <b>57</b>       | Neubacher, Frank        | <b>544</b> |
| Herz, Clara       | <b>589</b>      | Neumann, Laura          | <b>776</b> |
| Hoppe, Amina      | <b>544</b>      | Neumann, Ulfrid         | <b>103</b> |
| Hörnle, Tatjana   | <b>643</b>      | Puppe, Ingeborg         | <b>255</b> |
| Horter, Tillmann  | <b>503</b>      | Rostalski, Frauke       | <b>373</b> |
| Hoven, Elisa      | <b>433, 697</b> | Schröder, Jan-Christian | <b>298</b> |
| Kinzig, Jörg      | <b>413</b>      | Schwarz, Laura          | <b>57</b>  |
| Knauer, Florian   | <b>271</b>      | Strauß, Samuel          | <b>724</b> |
| Koch, Arnd        | <b>397</b>      | Wolf, Christoph         | <b>6</b>   |
| Kulhanek, Tobias  | <b>562</b>      | Wörner, Liane           | <b>616</b> |
| Laubenthal, Klaus | <b>164</b>      | Wu, Hao-Hao             | <b>127</b> |
| Lenk, Maximilian  | <b>348</b>      |                         |            |

## V. Jahresregister der Auslandsrundschau der ZStW, 136. Band, 2024

- 223** Sexualdelikte in der erneuerten Fassung des Model Penal Code (USA)  
 (1) Von Professor Dr. *Tatjana Hörnle*, Freiburg i.Br. und Professor *Erin E. Murphy*, New York (USA)
- 241** The Offense of Illicit Enrichment in Spain  
 (19) Von *Jordi Miró Estradé* (LL.M.), Barcelona (Spanien)
- 
- 829** Kriminelles Crawling – Die Strafbarkeit der automatisierten Auswertung öffentlich zugänglicher Daten in Deutschland und China  
 (35) Von Assistant Professor Dr. *Huawei Wang*, Peking (China) und Juniorprofessor Dr. *Sebastian Golla*, Bochum
- 849** Neue Perspektiven zum Vorsatz im norwegischen Strafrecht  
 (55) Von Professor Dr. *Erling Johannes Husabø*, Bergen (Norwegen)

## VI. Verzeichnis der Verfasser von Beiträgen in der Auslandsrundschau 2024

|                         |       |            |
|-------------------------|-------|------------|
| Brodowski, Dominik      | (167) | <b>659</b> |
| Cai, Guisheng           | (39)  | <b>327</b> |
| Estradé, Jordi Miró     | (19)  | <b>241</b> |
| Golla, Sebastian        | (35)  | <b>829</b> |
| Hörnle, Tatjana         | (1)   | <b>223</b> |
| Husabø, Erling Johannes | (55)  | <b>849</b> |
| Murphy, Erin E.         | (1)   | <b>223</b> |
| Wang, Huawei            | (35)  | <b>829</b> |
